# Supplementary material for: Analysis of SARS-CoV-2 Ig seroprevalence in Northern Ireland
Source: bioRxiv or medRxiv preprint supplement (doi:10.1101/2023.09.19.23295776), 2023-09-20
Supplement: Supplementary file [file media-1.pdf]

## **Analysis of SARS-CoV-2 Ig seroprevalence in Northern Ireland. - Supplementary material**

Michelle K Greene<sup>1</sup>, Peter Smyth<sup>1</sup>, Andrew English<sup>2,3</sup>, Joseph McLaughlin<sup>2</sup>, Magda Bucholc<sup>4</sup>, Janice Bailie<sup>5</sup>, Julie McCarroll<sup>5</sup>, Margaret McDonnell<sup>6</sup>, Alison Watt<sup>7</sup>, George Barnes<sup>8</sup>, Mark Lynch<sup>9</sup>, Kevan Duffin<sup>10</sup>, Gerard Duffy<sup>11</sup>, Claire Lewis<sup>12</sup>, Jacqueline A James<sup>1,12,13</sup>, Tom Ford<sup>14</sup>, Maurice O’Kane<sup>9</sup>, Taranjit Singh Rai<sup>2</sup>, Anthony J Bjourson<sup>2</sup>, Christopher Cardwell<sup>15</sup>, J Stuart Elborn<sup>16</sup>, David S Gibson<sup>2</sup>, Christopher J Scott<sup>1\*</sup>

<sup>1</sup> The Patrick G Johnston Centre for Cancer Research, Queen’s University Belfast, Belfast, UK

<sup>2</sup> Personalised Medicine Centre, School of Medicine, Ulster University, Londonderry, UK

<sup>3</sup> School of Health and Life Sciences, Teeside University, Middlesbrough, UK

<sup>4</sup> Intelligent Systems Research Centre, School of Computing, Engineering & Intelligent Systems, Ulster University, Londonderry, UK

<sup>5</sup> HSC R&D Division, Public Health Agency, Belfast, UK

<sup>6</sup> Department of Clinical Biochemistry, Belfast Health and Social Care Trust, Belfast, UK

<sup>7</sup> Regional Virology Laboratory, Belfast Health and Social Care Trust, Belfast, UK

<sup>8</sup> Department of Clinical Biochemistry, South-Eastern Health and Social Care Trust, Dundonald, UK

<sup>9</sup> Department of Clinical Biochemistry, Altnagelvin Hospital, Western Health and Social Care Trust, Londonderry, UK

<sup>10</sup> Department of Clinical Biochemistry, Southern Health and Social Care Trust, Portadown, UK

<sup>11</sup> Department of Clinical Biochemistry, Northern Health and Social Care Trust, Antrim, UK

<sup>12</sup> The Northern Ireland Biobank, Queen's University Belfast, Belfast, UK

<sup>13</sup> Regional Molecular Diagnostic Service, Belfast Health and Social Care Trust, Belfast, UK

<sup>14</sup> Bacteriology Branch, Veterinary Sciences Division, AFBI, Belfast, UK

<sup>15</sup>Centre for Public Health, School of Medicine, Dentistry and Biomedical Sciences, Queen's University Belfast, Belfast, UK

<sup>16</sup>Wellcome-Wolfson Institute for Experimental Medicine, Queen's University Belfast, Belfast, UK

\*Corresponding Author - **Christopher J. Scott** – Patrick G Johnston Centre for Cancer Research, School of Medicine, Dentistry and Biomedical Sciences, Queen's University Belfast, Belfast BT9 7AE, U.K.; Email: [c.scott@qub.ac.uk](mailto:c.scott@qub.ac.uk); Telephone: +44 (0)28 9097 2350

**Supplementary Table 1. Overall estimates by time period.**

|                                               | June/July 2020 |                          | Nov/Dec 2020 |                          | June/July 2021 |                          |
|-----------------------------------------------|----------------|--------------------------|--------------|--------------------------|----------------|--------------------------|
|                                               | cases/total    | estimate<br>(95% CI/CrI) | cases/total  | estimate<br>(95% CI/CrI) | cases/total    | estimate<br>(95% CI/CrI) |
| Crude apparent proportion                     | 43/1108        | 3.9% (2.9%, 5.4%)        | 64/1242      | 5.2% (4.0%, 6.5%)        | 290/2494       | 11.6% (10.4%, 13.0%)     |
| Standardised apparent proportion <sup>1</sup> | 43/1108        | 3.6% (1.7%, 5.6%)        | 64/1238      | 5.2% (3.6%, 6.7%)        | 290/2493       | 12.9% (11.2%, 14.5%)     |
| Crude true proportion <sup>2</sup>            | 43/1108        | 3.4% (1.6%, 5.2%)        | 64/1242      | 5.1% (3.2%, 7.1%)        | 290/2494       | 13.4% (11.4%, 15.7%)     |
| Standardised true proportion <sup>3</sup>     | 43/1108        | 3.6% (1.8%, 5.8%)        | 64/1238      | 5.4% (3.7%, 7.5%)        | 290/2493       | 14.5% (12.5%, 16.7%)     |

<sup>1</sup>Based upon NI age (0-29,30-49,50-69,70+) and gender distribution, one individual missing gender. <sup>2</sup>True proportion using Bayesian method (used by PHE England), credible intervals used instead of confidence intervals, assuming sensitivity of 79% (137/173) and specificity of 98% (699/707). <sup>3</sup>True proportion using Bayesian method (used by PHE England), credible intervals used instead of confidence intervals, assuming sensitivity of 79% (137/173) and specificity of 98% (699/707) and standardised based upon NI age (0-29,20-49,50-69,70+) and gender distribution.

**Supplementary Table 2. Comparison of COVID-19 proportions by time period.**

|                | COVID-19 cases/total (%) | P <sup>1</sup> | Odds Ratio (OR) (95% CI) | P      | Adjusted <sup>2</sup> OR (95% CI) | P      |
|----------------|--------------------------|----------------|--------------------------|--------|-----------------------------------|--------|
| June/July 2020 | 43/1108 (3.9%)           |                | 1.00 (ref. cat.)         |        | 1.00 (ref. cat.)                  |        |
| Nov/Dec 2020   | 64/1242 (5.2%)           | <0.001         | 1.35 (0.91, 2.00)        | 0.14   | 1.33 (0.89, 1.99)                 | 0.16   |
| June/July 2021 | 290/2494 (11.6%)         |                | 3.26 (2.35, 4.53)        | <0.001 | 3.09 (2.21, 4.31)                 | <0.001 |

<sup>1</sup>Chi-squared 2x3 P-value. <sup>2</sup>Adjusting for trust, age and sex.

**Supplementary Table 3. Sample characteristics by time period.** Breakdown of total numbers of samples assayed (N) and percentage (%) according to Health and Social Care Trust, age group and gender across all three testing rounds.

|                                     | Round 1        | Round 2      | Round 3        |
|-------------------------------------|----------------|--------------|----------------|
|                                     | June/July 2020 | Nov/Dec 2020 | June/July 2021 |
|                                     | N (%)          | N (%)        | N (%)          |
| <b>Health and Social Care Trust</b> |                |              |                |
| Belfast                             | 223 (20.1%)    | 246 (19.8%)  | 499 (20.0%)    |
| Western                             | 210 (19.0%)    | 248 (20.0%)  | 495 (19.8%)    |
| Southern                            | 225 (20.3%)    | 248 (20.0%)  | 500 (20.0%)    |
| Northern                            | 225 (20.3%)    | 250 (20.1%)  | 500 (20.0%)    |
| South Eastern                       | 225 (20.3%)    | 250 (20.1%)  | 500 (20.0%)    |
| <b>Age group</b>                    |                |              |                |
| 0-29                                | 74 (6.7%)      | 152 (12.3%)  | 341 (13.7%)    |
| 30-49                               | 185 (16.7%)    | 278 (22.4%)  | 585 (23.5%)    |
| 50-69                               | 394 (35.6%)    | 452 (36.5%)  | 850 (34.1%)    |
| 70+                                 | 453 (41.0%)    | 357 (28.8%)  | 718 (28.8%)    |
| <b>Gender</b>                       |                |              |                |
| Female                              | 580 (52.5%)    | 682 (55.0%)  | 1417 (56.8%)   |
| Male                                | 525 (47.5%)    | 559 (45.0%)  | 1076 (43.2%)   |

**Supplementary Table 4. Neutralising IgG reactivity summary of round 3 subpopulation. Reactivity**

cut-off concentrations: \* Spike =0.533 µg/ml; <sup>§</sup> S1 RBD =0.726 µg/ml.

|                                                    |                                     | 0-29 years (n=35) |        | 30-49 years (n=80) |       | 50-69 years (n=99) |       | 70+ years (n=64) |       | Total (n=278) |         |
|----------------------------------------------------|-------------------------------------|-------------------|--------|--------------------|-------|--------------------|-------|------------------|-------|---------------|---------|
| Age (Median, IQR)                                  |                                     | 22                | ± 3.75 | 40.5               | ± 10  | 59                 | ± 8   | 78               | ± 8.5 | 55            | ± 29.25 |
| Female (n, %)                                      |                                     | 17                | 48.6%  | 47                 | 58.8% | 54                 | 54.5% | 38               | 59.4% | 156           | 56.1%   |
| <b>ACE2<br/>pseudoneutralisation<br/>assay</b>     | <b>wild type</b>                    |                   |        |                    |       |                    |       |                  |       |               |         |
|                                                    | Spike Reactive (n, %)*              | 19                | 54.3%  | 48                 | 60.0% | 73                 | 73.7% | 55               | 85.9% | 195           | 70.1%   |
|                                                    | S1 RBD Reactive (n, %) <sup>§</sup> | 27                | 77.1%  | 53                 | 66.3% | 72                 | 72.7% | 52               | 81.3% | 204           | 73.4%   |
|                                                    | <b>S1 RBD</b>                       |                   |        |                    |       |                    |       |                  |       |               |         |
|                                                    | Alpha (B.1.1.7) Reactive (n, %)     | 28                | 80.0%  | 54                 | 67.5% | 69                 | 69.7% | 51               | 79.7% | 202           | 72.7%   |
|                                                    | Beta (B.1.351) Reactive (n, %)      | 16                | 45.7%  | 39                 | 48.8% | 65                 | 65.7% | 39               | 60.9% | 159           | 57.2%   |
|                                                    | Gamma (P.1) Reactive (n, %)         | 26                | 74.3%  | 47                 | 58.8% | 72                 | 72.7% | 49               | 76.6% | 194           | 69.8%   |
|                                                    | <b>Spike</b>                        |                   |        |                    |       |                    |       |                  |       |               |         |
|                                                    | Alpha (B.1.1.7) Reactive (n, %)     | 16                | 45.7%  | 44                 | 55.0% | 66                 | 66.7% | 53               | 82.8% | 179           | 64.4%   |
|                                                    | Beta (B.1.351) Reactive (n, %)      | 19                | 54.3%  | 40                 | 50.0% | 67                 | 67.7% | 51               | 79.7% | 177           | 63.7%   |
| Gamma (P.1) Reactive (n, %)                        | 17                                  | 48.6%             | 38     | 47.5%              | 70    | 70.7%              | 50    | 78.1%            | 175   | 62.9%         |         |
| <b>Roche Elecsys Anti-SARS-CoV-2<br/>IgG Assay</b> | N-Antibody Reactive (n, %)          | 2                 | 5.7%   | 5                  | 6.3%  | 7                  | 7.1%  | 1                | 1.6%  | 15            | 5.4%    |
|                                                    | S-Antibody Reactive (n, %)          | 16                | 45.7%  | 53                 | 66.3% | 92                 | 92.9% | 58               | 90.6% | 219           | 78.8%   |
